# Supplementary material for: The squamous cell carcinoma antigen/SERPINB3 protects cervical cancer cells from chemoradiation by preventing lysoptosis
Source: Research Square preprint supplement (doi:10.21203/rs.3.rs-228819/v1), 2021-02-19
Supplement: Supplementary file 1 [file 6e6b86707ad12de29bd09063.docx]

**Supplemental Figure Legends**


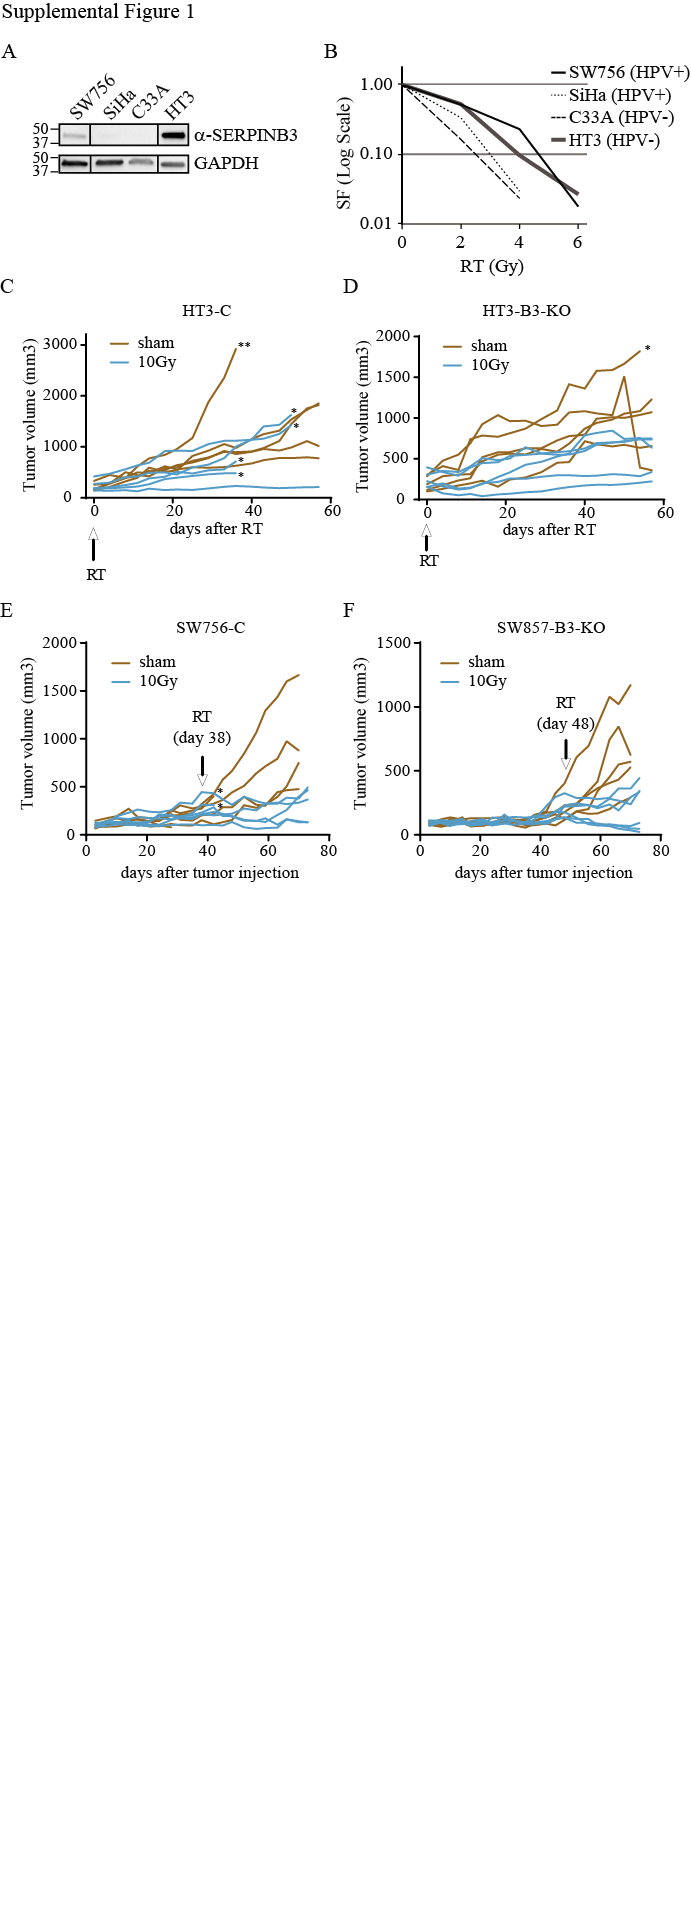


**Supplemental Figure 1. A)** Western blot showing steady state total cell lysate SERPINB3 protein levels in untreated SW756, SiHa, C33A and HT3 cells. **B)** Clonogenic survival of the four cell lines, two HPV+ and two HPV-). **C-F)** Spider plots of ellipsoid tumor volume in mm3 measured at 3-4 day intervals after subcutaneous injection of HT3-C **(C)** or –B3-KO **(D)** or SW756-C **(D)** or –B3-KO **(F)** cells. Tumors were treated at the indicated day with sham or 10Gy RT. * = mouse sacked for development of skin ulcer, ** = mouse sacked for tumor size criteria, all other mice sacked in bulk at end of the lines.


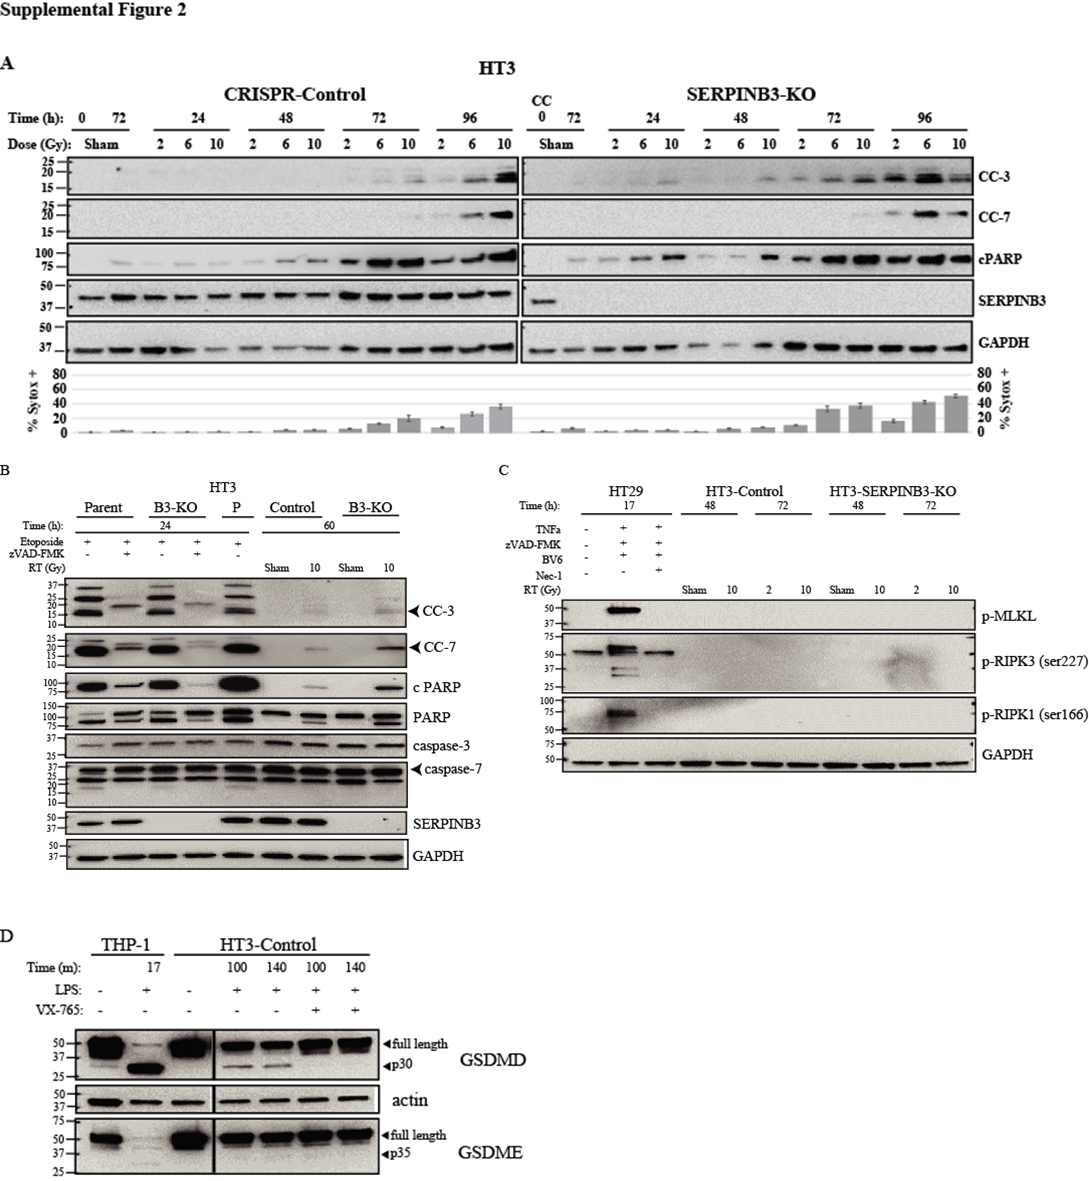


**Supplemental Figure 2. A)** Full Western blot of all dose levels and time points abbreviated in Figure 4A. % Sytox positive cells for each condition is shown beneath the Western blot. **B)** Control Western blot for markers of apoptosis, cleaved caspase-3 (CC-3), cleaved caspase-7 (CC-7) and PARP cleavage (cPARP). HT3 cells treated with etoposide to induce apoptosis, with or without zVAD-FMK pre-treatment to inhibit pan-caspase activity. Sham and 10Gy RT samples from HT3-C and –B3-KO cells are shown for reference. **C)** Control Western blot for markers of necroptosis, p-RIPK3, p-RIPK1 and p-MLKL. HT29 cells were treated with TNFα + zVAD-FMK + SMAC mimetic BV6 to induce necroptosis with or without necrostatin-1 (Nec-1). Sham and radiated HT3-C and –B3-KO cells are shown as reference. **D)** Control Western blot for markers of pyroptosis, GSDMD cleavage. THP-1 cells or HT3-C cells were treated with LPS for the indicated times to induce pyroptosis, with or without caspase-1 inhibitor VX-765.

**
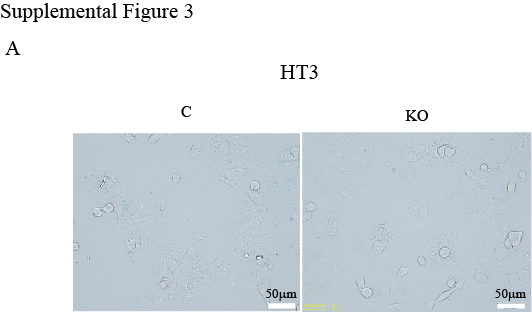
**

**Supplemental Figure 3.** Representative light microscope image of SA-βgal staining of HT3 cells.

**
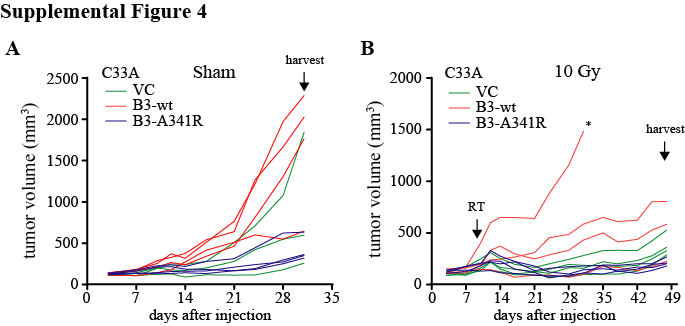
**

**Supplemental Figure 4.** Spider plots of absolute spheroid tumor volumes of C33A-VC, -B3, and –A341R tumors over time after injection. Time of radiation is indicated by the arrow (RT). * = mouse harvested for ulcer formation. All other mice were sacked and tumors harvested at the indicated time point.
